# Supplementary material
Source: PubMed Central journal article supplement (PMC6999855)
Supplement: NIHMS1068854-supplement-Appendix_1.pdf [file NIHMS1068854-supplement-Appendix_1.pdf]

**In the past 6 months, think about some behaviors that your dating partner (girlfriend/boyfriend, fiancée, husband/wife) did to you during any fights, conflicts, arguments, or physical attacks.**

**You used a gun on him/her.**

Never = 0  
Once = 1  
Twice = 2  
3-5 times = 3  
6-10 times = 4  
11-20 times = 5  
20+ times = 6

**In the PAST 6 MONTHS, think about some behaviors that you did during any fights, conflicts, arguments, or physical attacks with friends, neighbors, co workers, or strangers.**

**DO NOT INCLUDE YOUR GIRLFRIEND/ BOYFRIEND, FIANCEE, OR HUSBAND/WIFE.**

**You used a gun on someone.**

Never = 0  
Once = 1  
Twice = 2  
3 to 5 times = 3  
6 to 10 times = 4  
11 to 20 times = 5  
20+ times = 6

**These questions are about weapons. This is CONFIDENTIAL. We won't tell the police or ED staff your answers.**

**In the past 6 months including TODAY, how often did each of the following things happen?**

**You pulled a gun on someone**

Never = 0  
1 time = 1  
2 times = 2  
3-5 times = 3  
6-10 times = 4  
11-20 times = 5  
20+ times = 6

**In the past 6 months, think about some behaviors that your dating partner (girlfriend/boyfriend, fiancée, husband/wife) did to you during any fights, conflicts, arguments, or physical attacks.**

**He/She** used a gun on you

Never = 0  
Once = 1  
Twice = 2  
3-5 times = 3  
6-10 times = 4  
11-20 times = 5  
20+ times = 6

**In the PAST 6 MONTHS, think about some behaviors that happened to you during any fights, conflicts, arguments, or physical attacks with friends, neighbors, co workers, or strangers.**

**DO NOT INCLUDE YOUR GIRLFRIEND/ BOYFRIEND, FIANCEE, OR HUSBAND/WIFE.**

**Someone** used a gun on you.

Never = 0  
Once = 1  
Twice = 2  
3 to 5 times = 3  
6 to 10 times = 4  
11 to 20 times = 5  
20+ times = 6

**These questions are about weapons. This is CONFIDENTIAL. We won't tell the police or ED staff your answers.**

**In the past 6 months including TODAY, how often did each of the following things happen?**

**Someone** shot you

Never = 0  
1 time = 1  
2 times = 2  
3-5 times = 3  
6-10 times = 4  
11-20 times = 5  
20+ times = 6

## RETALIATION ATTITUDES

**Here are some attitudes that people may have about being injured:**

|                                                                                                                                        |                                                                          |
|----------------------------------------------------------------------------------------------------------------------------------------|--------------------------------------------------------------------------|
| I believe that if someone hits you, you should hit them back                                                                           | Strongly Agree = 1<br>Agree = 2<br>Disagree = 3<br>Strongly Disagree = 4 |
| I believe to survive you should always be willing to fight back                                                                        | Strongly Agree = 1<br>Agree = 2<br>Disagree = 3<br>Strongly Disagree = 4 |
| I believe to stay safe you should let people know that you will hurt them if they try to hurt you                                      | Strongly Agree = 1<br>Agree = 2<br>Disagree = 3<br>Strongly Disagree = 4 |
| I believe that if someone hurts you, you should forgive and forget<br>*Numeric codes have been reversed in the summary variable.       | Strongly Agree = 1<br>Agree = 2<br>Disagree = 3<br>Strongly Disagree = 4 |
| I believe revenge is a good thing                                                                                                      | Strongly Agree = 1<br>Agree = 2<br>Disagree = 3<br>Strongly Disagree = 4 |
| I believe that it is OK to hurt people if they hurt you first                                                                          | Strongly Agree = 1<br>Agree = 2<br>Disagree = 3<br>Strongly Disagree = 4 |
| I believe that if someone hits you, you should turn around and walk away<br>*Numeric codes have been reversed in the summary variable. | Strongly Agree = 1<br>Agree = 2<br>Disagree = 3<br>Strongly Disagree = 4 |

**COMMUNITY VIOLENCE****In the PAST 6 MONTHS, how often has this happened?**

|                                           |                                                                     |
|-------------------------------------------|---------------------------------------------------------------------|
| I have heard guns being shot              | Never = 0<br>Once or twice = 1<br>A few times = 2<br>Many times = 3 |
| I have seen drug deals.                   | Never = 0<br>Once or twice = 1<br>A few times = 2<br>Many times = 3 |
| My house has been broken into.            | Never = 0<br>Once or twice = 1<br>A few times = 2<br>Many times = 3 |
| I have seen somebody get stabbed or shot. | Never = 0<br>Once or twice = 1<br>A few times = 2<br>Many times = 3 |
| I have seen gangs in my neighborhood.     | Never = 0<br>Once or twice = 1<br>A few times = 2<br>Many times = 3 |

## PEER INFLUENCES

**These questions are about your friends.**

|                                                                            |                                                         |
|----------------------------------------------------------------------------|---------------------------------------------------------|
| My friends go to church regularly.                                         | None = 1<br>Some = 2<br>Many = 3<br>Most = 4<br>All = 5 |
| My friends take part in school or community clubs or athletics.            | None = 1<br>Some = 2<br>Many = 3<br>Most = 4<br>All = 5 |
| My friends got all A or B grades in high school.                           | None = 1<br>Some = 2<br>Many = 3<br>Most = 4<br>All = 5 |
| My friends plan to go to college, are in college or have finished college. | None = 1<br>Some = 2<br>Many = 3<br>Most = 4<br>All = 5 |

**These questions are about your friends.**

|                                                                                                                 |                                                         |
|-----------------------------------------------------------------------------------------------------------------|---------------------------------------------------------|
| My friends drink beer, wine or hard liquor at least once a month.                                               | None = 1<br>Some = 2<br>Many = 3<br>Most = 4<br>All = 5 |
| My friends smoke marijuana at least once a month.                                                               | None = 1<br>Some = 2<br>Many = 3<br>Most = 4<br>All = 5 |
| My friends have used cocaine, heroin, morphine, pills, PCP, or sniff glue, paint, or gas at least once a month. | None = 1<br>Some = 2<br>Many = 3<br>Most = 4<br>All = 5 |
| My friends have been busted for selling drugs or for having drugs.                                              | None = 1<br>Some = 2<br>Many = 3<br>Most = 4<br>All = 5 |

|                                                                              |                                                         |
|------------------------------------------------------------------------------|---------------------------------------------------------|
| My friends get into fights.                                                  | None = 1<br>Some = 2<br>Many = 3<br>Most = 4<br>All = 5 |
| My friends have carried a knife, razor, or a gun.                            | None = 1<br>Some = 2<br>Many = 3<br>Most = 4<br>All = 5 |
| My friends shoplift from stores or have been busted for burglary or robbery. | None = 1<br>Some = 2<br>Many = 3<br>Most = 4<br>All = 5 |

Note: The first four questions comprise the positive influences scale and the last seven comprise the negative influences scale
